# Supplementary material for: Anterior cruciate ligament-derived mesenchymal stromal cells have a propensity to differentiate into the ligament lineage
Source: PubMed Central journal article supplement — Regen Ther. 2018 Jan 23;8:20–8. doi: 10.1016/j.reth.2017.12.001 (PMC6149186; doi:10.1016/j.reth.2017.12.001), 2018-01-23
Supplement: mmc1.pdf [file mmc1.pdf]

## **Supplementary figures and tables for**

**Anterior cruciate ligament-derived mesenchymal stromal cells have a propensity to differentiate propensity into the ligament lineage.**

## **Authors**

Yusuke Ogata, Yo Mabuchi, Kosuke Shinoda, Yuta Horiike, Mitsuru Mizuno, Koji Otabe, Eriko Grace Suto, Nobuharu Suzuki, Ichiro Sekiya & Chihiro Akazawa

**Supplementary Fig.S1:** Differentiation ability of ACL-MSCs

**Supplementary Fig.S2:** Cell surface marker analysis of cultured ACL-MSCs

**Supplementary Fig.S3:** The location between ACL-MSCs and ligament markers

**Supplementary Table.S1:** Donors information

**Supplementary Table.S2:** Antibodies for FACS

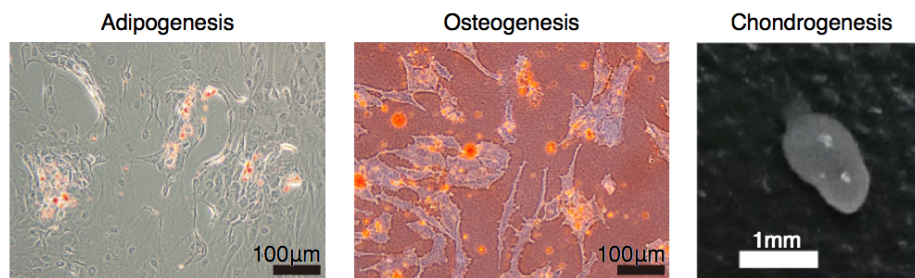

**Supplementary Fig.S1 | Differentiation ability of ACL-MSCs.**

Representative phase contrast micrographs of ACL-derived CD73+/90+ cells differentiated into adipocytes (left), osteoblasts (middle) and chondrocytes (right).

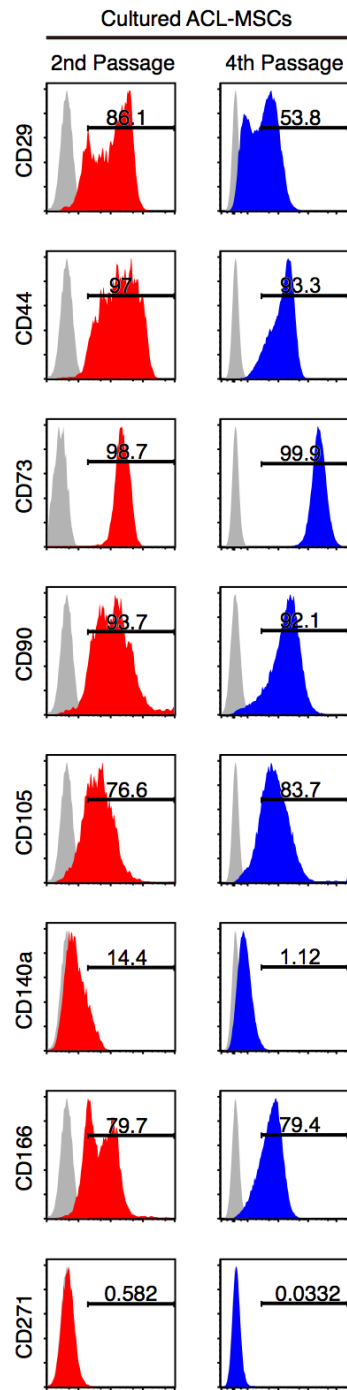

**Supplementary Fig.S2 | Cell surface marker analysis of cultured ACL-MSCs.**

Representative cell surface expression of CD29, 44, 73, 90, 105, 140a, 166 and 271 in cultured CD73<sup>+</sup>/90<sup>+</sup> ACL-MSCs at 2nd (left, red) and 4th (right, blue) passage (gray; isotype control).

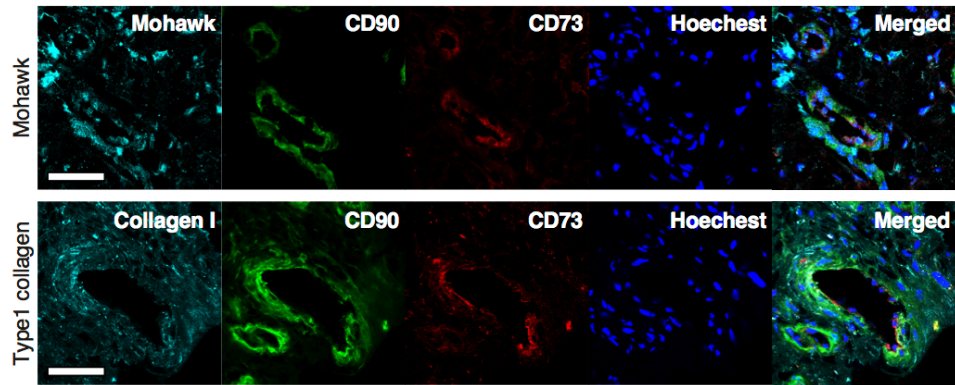

**Supplementary Fig.S3 | The location between ACL-MSCs and ligament markers.**

Immunofluorescent staining of human ACL tissue with anti-human Mohawk (cyan, upper), Type 1 collagen (cyan, bottom), CD90 (green), CD73 (red) and nuclei (blue) (Scale bars = 50 $\mu$ m)

**Supplementary Table.S1 | Donors information**

| Donor # | Age | Gender | Operative Procedure | Primary Disease | Used tissue           |                       |
|---------|-----|--------|---------------------|-----------------|-----------------------|-----------------------|
|         |     |        |                     |                 | ACL                   | BM                    |
| 1       | 65  | Female | TKA*                | OA**            | <input type="radio"/> |                       |
| 2       | 67  | Male   |                     |                 | <input type="radio"/> |                       |
| 3       | 83  | Female |                     |                 | <input type="radio"/> |                       |
| 4       | 73  | Male   |                     |                 | <input type="radio"/> |                       |
| 5       | 79  | Female |                     |                 | <input type="radio"/> |                       |
| 6       | 70  | Female |                     |                 | <input type="radio"/> |                       |
| 7       | 75  | Male   |                     |                 | <input type="radio"/> | <input type="radio"/> |
| 8       | 70  | Female |                     |                 | <input type="radio"/> | <input type="radio"/> |
| 9       | 73  | Male   |                     |                 | <input type="radio"/> | <input type="radio"/> |
| 10      | 74  | Female |                     |                 | <input type="radio"/> | <input type="radio"/> |
| 11      | 69  | Female |                     |                 | <input type="radio"/> | <input type="radio"/> |
| 12      | 76  | Male   |                     |                 |                       | <input type="radio"/> |
| 13      | 74  | Female |                     |                 |                       | <input type="radio"/> |
| 14      | 68  | Female |                     |                 |                       | <input type="radio"/> |

\*TKA: Total Knee Arthroplasty

\*\*OA: Osteoarthritis of knee joint

**Supplementary Table.S2 | Antibodies for FACS**

| Color  | Antigen | Company       |
|--------|---------|---------------|
| PE     | CD29    | BioLegend     |
|        | CD44    |               |
|        | CD105   |               |
|        | CD106   |               |
|        | CD140a  |               |
|        | CD146   |               |
|        | CD166   |               |
| PE-Cy7 | CD271   | BD Pharmingen |
|        | CD31    |               |
|        | CD45    |               |
|        | CD90    |               |
| FITC   | CD235a  |               |
| APC    | CD90    |               |
|        | CD29    |               |
|        | CD44    |               |
|        | CD73    |               |
|        | CD105   |               |
|        | CD106   |               |
